# Supplementary material
Source: publisher figshare collection journal article supplement (https://acs.figshare.com/ndownloader/files/20205795)

**Supporting Information for**  
**Microbial Community Predicts Functional Stability of Microbial Fuel**  
**Cells Using Machine Learning Techniques**

*Keaton Larson Lesnik<sup>1,2</sup>, Wenfang Cai<sup>1,3</sup> and Hong Liu<sup>1</sup>\**

<sup>1</sup> Biological and Ecological Engineering, Oregon State University, Corvallis, OR 97333, USA

<sup>2</sup> Maia Analytica LLC, Corvallis, OR 97330

<sup>3</sup> Department of Environmental Science and Engineering, Xi'an Jiaotong University, Xi'an,  
710049, China

\* Corresponding author. Phone: (541) 737– 6309. Email: [hong.liu@oregonstate.edu](mailto:hong.liu@oregonstate.edu)

**Supporting Information includes 1 table, 2 figures, and 4 pages**

## Electrochemical and Recovery Data

**Table S1.** Electrochemical characterization and perturbation data

| Reactor Number | External Resistance | Current (initial)    | Current (disruption) | Current (recovered)  | Recovery Rate                         | Recovery Time |
|----------------|---------------------|----------------------|----------------------|----------------------|---------------------------------------|---------------|
|                | ( $\Omega$ )        | (A m <sup>-2</sup> ) | (A m <sup>-2</sup> ) | (A m <sup>-2</sup> ) | (mA m <sup>-2</sup> h <sup>-1</sup> ) | (hrs)         |
| MFC 1          | 624                 | 2.14                 | 1.39                 | 2.82                 | 10                                    | 127.9         |
| MFC 2          | 464                 | 2.67                 | 0.52                 | 2.71                 | 13                                    | 165.4         |
| MFC 3          | 330                 | 2.66                 | 0.03                 | 0.45                 | -                                     | -             |
| MFC 4          | 495                 | 2.46                 | 1.98                 | 3                    | 11                                    | 48.4          |
| MFC 5          | 330                 | 2.9                  | 1.03                 | 4.37                 | 35                                    | 49.5          |
| MFC 6          | 80                  | 8.6                  | 4.86                 | 9.27                 | 86                                    | 120.8         |
| MFC 7          | 164                 | 7.11                 | 6.22                 | 7.11                 | 37                                    | 14.5          |
| MFC 8          | 265                 | 3.55                 | 2.68                 | 3.77                 | 23                                    | 30.3          |
| MFC 9          | 120                 | 7.58                 | 1.16                 | 7.62                 | 90                                    | 69.3          |
| MFC 10         | 348                 | 2.69                 | 0.01                 | 0.13                 | -                                     | -             |
| MFC 11         | 650                 | 1.85                 | 1.35                 | 3.03                 | 17                                    | 28.3          |
| MFC 12         | 118                 | 5.88                 | 0.11                 | 0.23                 | -                                     | -             |
| MFC 13         | 385                 | 2.69                 | 2.41                 | 2.67                 | 11                                    | 13.1          |
| MFC 14         | 800                 | 1.69                 | 1.35                 | 1.7                  | 5                                     | 269           |
| MFC 15         | 95                  | 8.84                 | 0.11                 | 8.84                 | 107                                   | 19.9          |
| MFC 16         | 120                 | 8.68                 | 2.41                 | 8.46                 | 10                                    | 79.6          |
| MFC 17         | 325                 | 3.35                 | 3.16                 | 3.46                 | 20                                    | 1.5           |
| Min            | 336                 | 1.69                 | 0.01                 | 0.13                 | 5                                     | 1.5           |
| Max            | 215                 | 8.84                 | 6.22                 | 9.27                 | 107                                   | 269           |
| Average        | 336                 | 4.43                 | 1.81                 | 4.1                  | 34                                    | 74.1          |
| Std. Dev.      | 215                 | 2.67                 | 1.72                 | 3.04                 | 34                                    | 74.5          |

## Resistance and Resilience Plot

**Figure S1.** Plot of resistance and resilience coefficients with lines designating classification levels (low, mid, high) for both resistance and resilience.

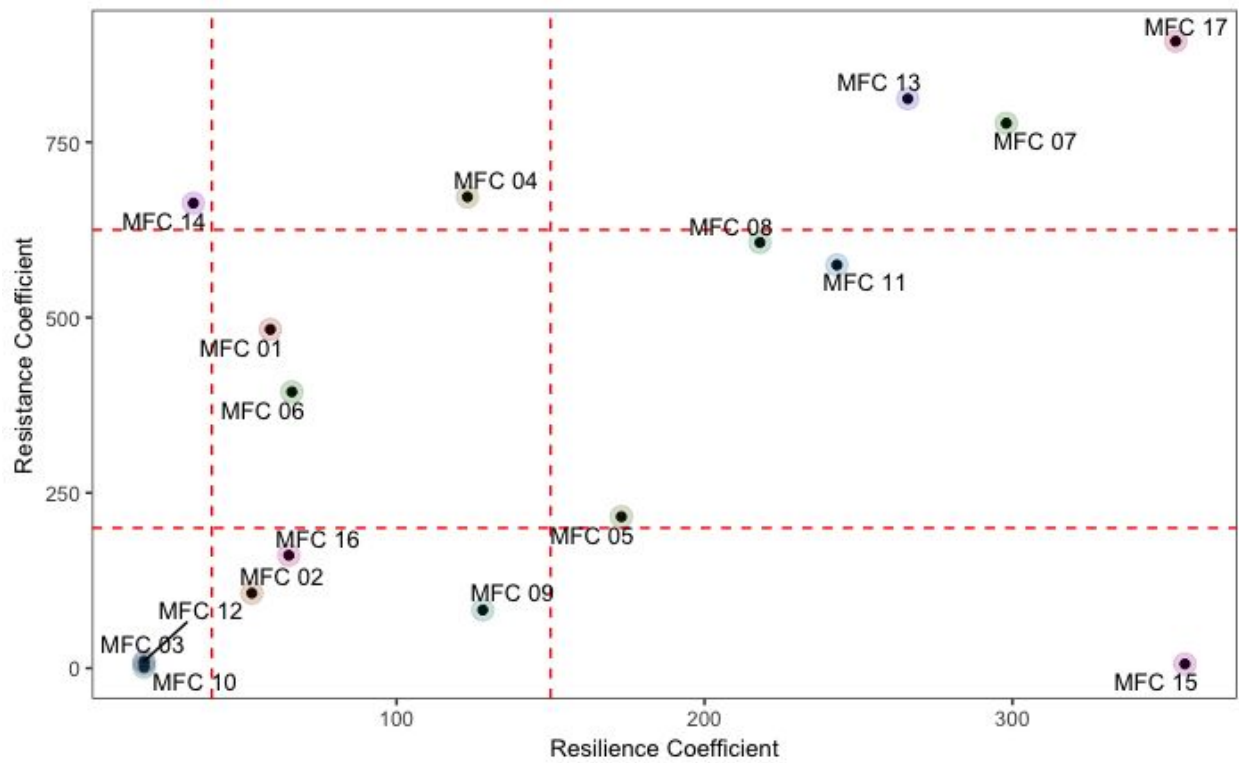

## Electrochemical Correlation of Genera

**Figure S2.** Heat map of Pearson's correlation between most abundant genera and electrochemical characteristics.

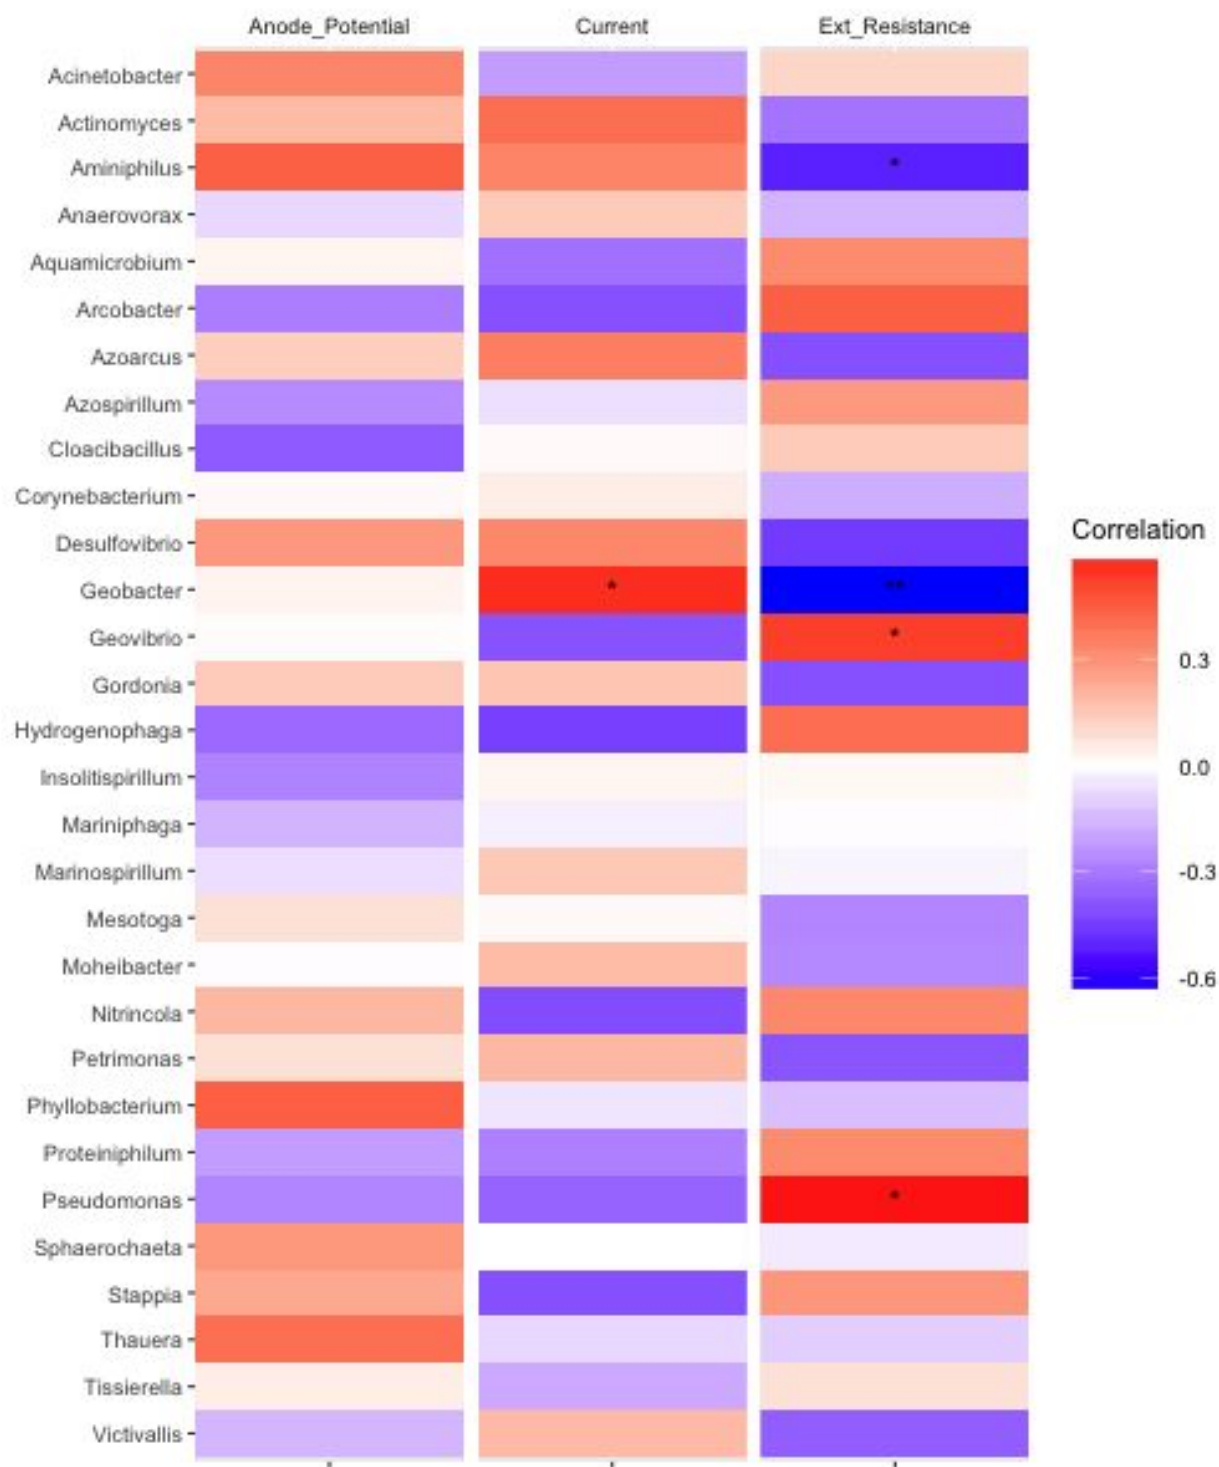

Supplement: Supplementary file 1 [file 20205795]
